# Supplementary material for: Cervical Human Papillomavirus Infection (HPV) and High Oncogenic Risk Genotypes among Women Living with HIV in Asia: A Meta-Analysis
Source: MDPI journal article supplement (doi:10.3390/jcm10091911), 2021-04-28
Supplement: s1 [file s1]

# Cervical human papillomavirus infection (HPV) and high-oncogenic risk genotypes among women living with HIV in Asia: a meta-analysis

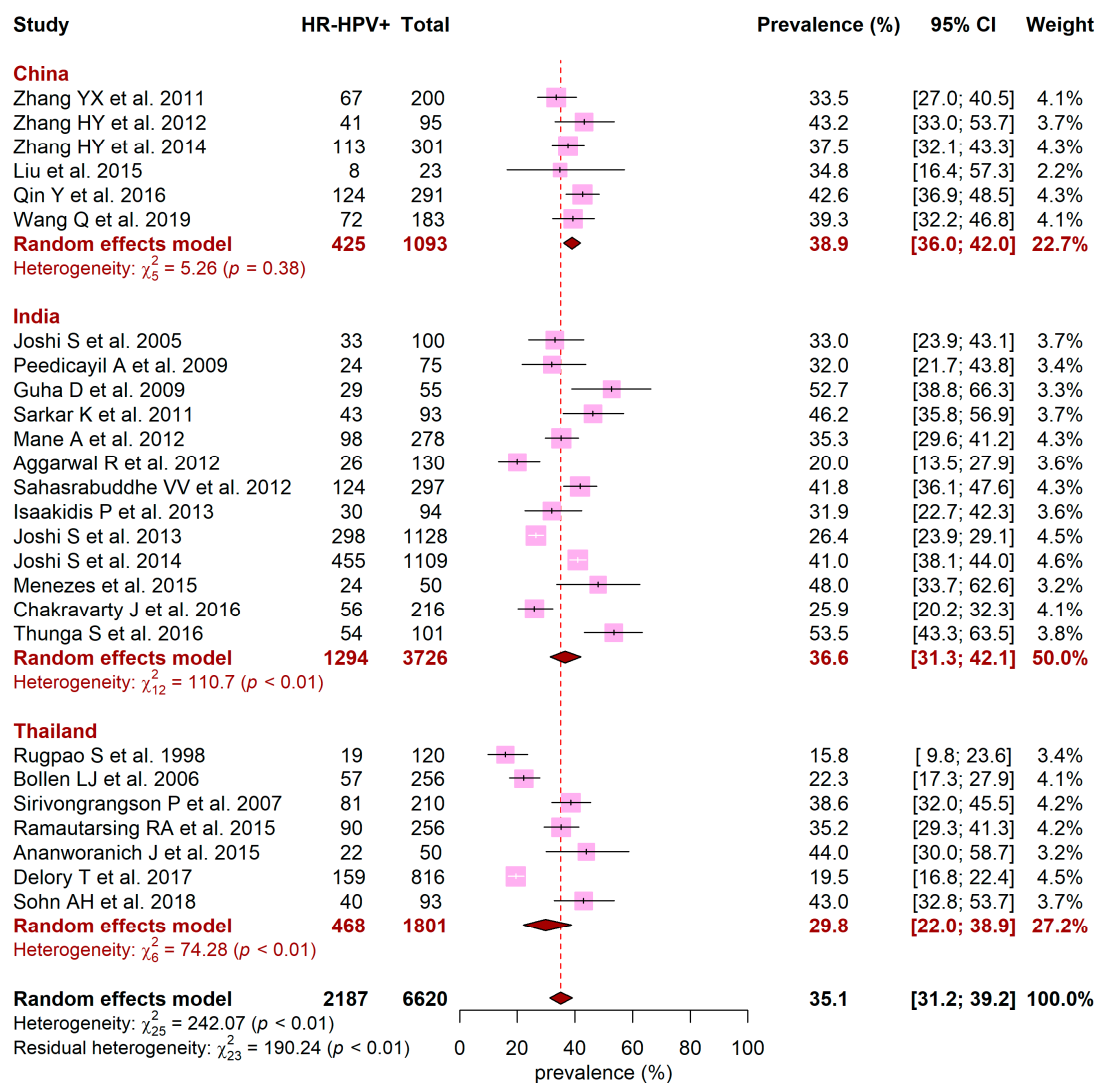

**Figure S1.** Forest plot of HR-HPV prevalence across China, India, and Thailand. Sensitivity analysis. Meta-analyses with random-effects models. HR-HPV: high-risk human papillomavirus; CI: confidence interval.
